# Supplementary material
Source: PubMed Central journal article supplement (PMC3098558)
Supplement: NIHMS217314-supplement-1.pdf [file NIHMS217314-supplement-1.pdf]

| Accession | GeneSymbol | Fold change-<br>Anterior Cingulate | Rank Anterior<br>Cingulate (T-<br>values) | Fold change-<br>DLPFC | Rank<br>DLPFC (T-<br>values) |
|-----------|------------|------------------------------------|-------------------------------------------|-----------------------|------------------------------|
| AK125173  | 76P        | 1.32                               | 542                                       | 1.27                  | 640                          |
| NM_015423 | AASDHPPT   | 1.47                               | 802                                       | 1.30                  | 1257                         |
| NM_172346 | ABCA6      | 0.83                               | 994                                       | 0.91                  | 2302                         |
| NM_000927 | ABCB1      | 0.82                               | 932                                       | 0.87                  | 1633                         |
| NM_203445 | ABCB9      | 1.25                               | 861                                       | 1.18                  | 1463                         |
| NM_001092 | ABR        | 1.29                               | 477                                       | 1.21                  | 927                          |
| NM_005891 | ACAT2      | 1.49                               | 589                                       | 1.59                  | 290                          |
| NM_198830 | ACLY       | 1.22                               | 1469                                      | 1.17                  | 2278                         |
| NM_004035 | ACOX1      | 0.83                               | 1171                                      | 0.82                  | 859                          |
| NM_004300 | ACP1       | 1.35                               | 648                                       | 1.36                  | 517                          |
| NM_001610 | ACP2       | 1.24                               | 1169                                      | 1.22                  | 1270                         |
| NM_005722 | ACTR2      | 1.31                               | 773                                       | 1.33                  | 555                          |
| NM_138448 | ACYP2      | 1.51                               | 998                                       | 1.40                  | 1161                         |
| AU119333  | ADAM10     | 0.96                               | 5485                                      | 0.98                  | 7226                         |
| NM_003812 | ADAM23     | 1.51                               | 656                                       | 1.40                  | 813                          |
| NM_015833 | ADARB1     | 1.50                               | 526                                       | 1.32                  | 1061                         |
| NM_001117 | ADCYAP1    | 1.24                               | 1484                                      | 1.31                  | 868                          |

| Fold change-Cerebellum | Rank Cerebellum (T-values) | Count Brain Region (1.2 and top 1000) |
|------------------------|----------------------------|---------------------------------------|
| 1.41                   | 111                        | 3                                     |
| 1.29                   | 802                        | 2                                     |
| 1.00                   | 8199                       | 1                                     |
| 0.92                   | 2385                       | 1                                     |
| 1.13                   | 1959                       | 1                                     |
| 0.83                   | 797                        | 3                                     |
| 1.19                   | 1613                       | 2                                     |
| 1.25                   | 498                        | 1                                     |
| 0.92                   | 2927                       | 1                                     |
| 1.25                   | 450                        | 3                                     |
| 1.22                   | 893                        | 1                                     |
| 1.34                   | 323                        | 3                                     |
| 1.47                   | 558                        | 2                                     |
| 1.27                   | 621                        | 1                                     |
| 1.17                   | 1594                       | 2                                     |
| 1.05                   | 5176                       | 1                                     |
| 1.06                   | 4452                       | 1                                     |
